# Supplementary material
Source: Research Square preprint supplement (doi:10.21203/rs.3.rs-7176105/v1)
Supplement: Supplementary file 1 [file 71b27fa49175972c5bcf5e57.docx]

Supplementary Materials for

**A dynamic urban waterlogging risk assessment framework integrating RAGA-optimized projection pursuit and scenario simulation for targeted flood mitigation**

**Table S1** Calibration results of relevant parameters

| Parameters | Building | Road | Green space | Water body | Others |
| --- | --- | --- | --- | --- | --- |
| Runoff type | Fixed | Fixed | Horton | Fixed | Horton |
| Fixed runoff coefficient | 0.8 | 0.8 | - | 0 | - |
| Routing type | Rel | Rel | Rel | Rel | Rel |
| Routing model | SWMM | SWMM | SWMM | SWMM | SWMM |
| Routing parameters | 0.015 | 0.013 | 0.5 | 1 | 0.016 |
| Surface type | Impervious | Impervious | Pervious | Impervious | Pervious |
| Initial infiltration rate (mm/h) | - | - | 90 | - | 71 |
| Stable infiltration rate (mm/h) | - | - | 3.8 | - | 2.6 |
| Decay factor (1/h) | - | - | 2.5 | - | 2.5 |

**Table S2** Validation metrics for ponding depth simulations

| Ponding point ID | Measured depth (m) | Simulated depth (m) | Relative error (RE) (%) |
| --- | --- | --- | --- |
| a | 0.19 | 0.21 | 10.53 |
| b | 0.16 | 0.18 | 12.50 |
| c | 0.18 | 0.16 | 11.11 |


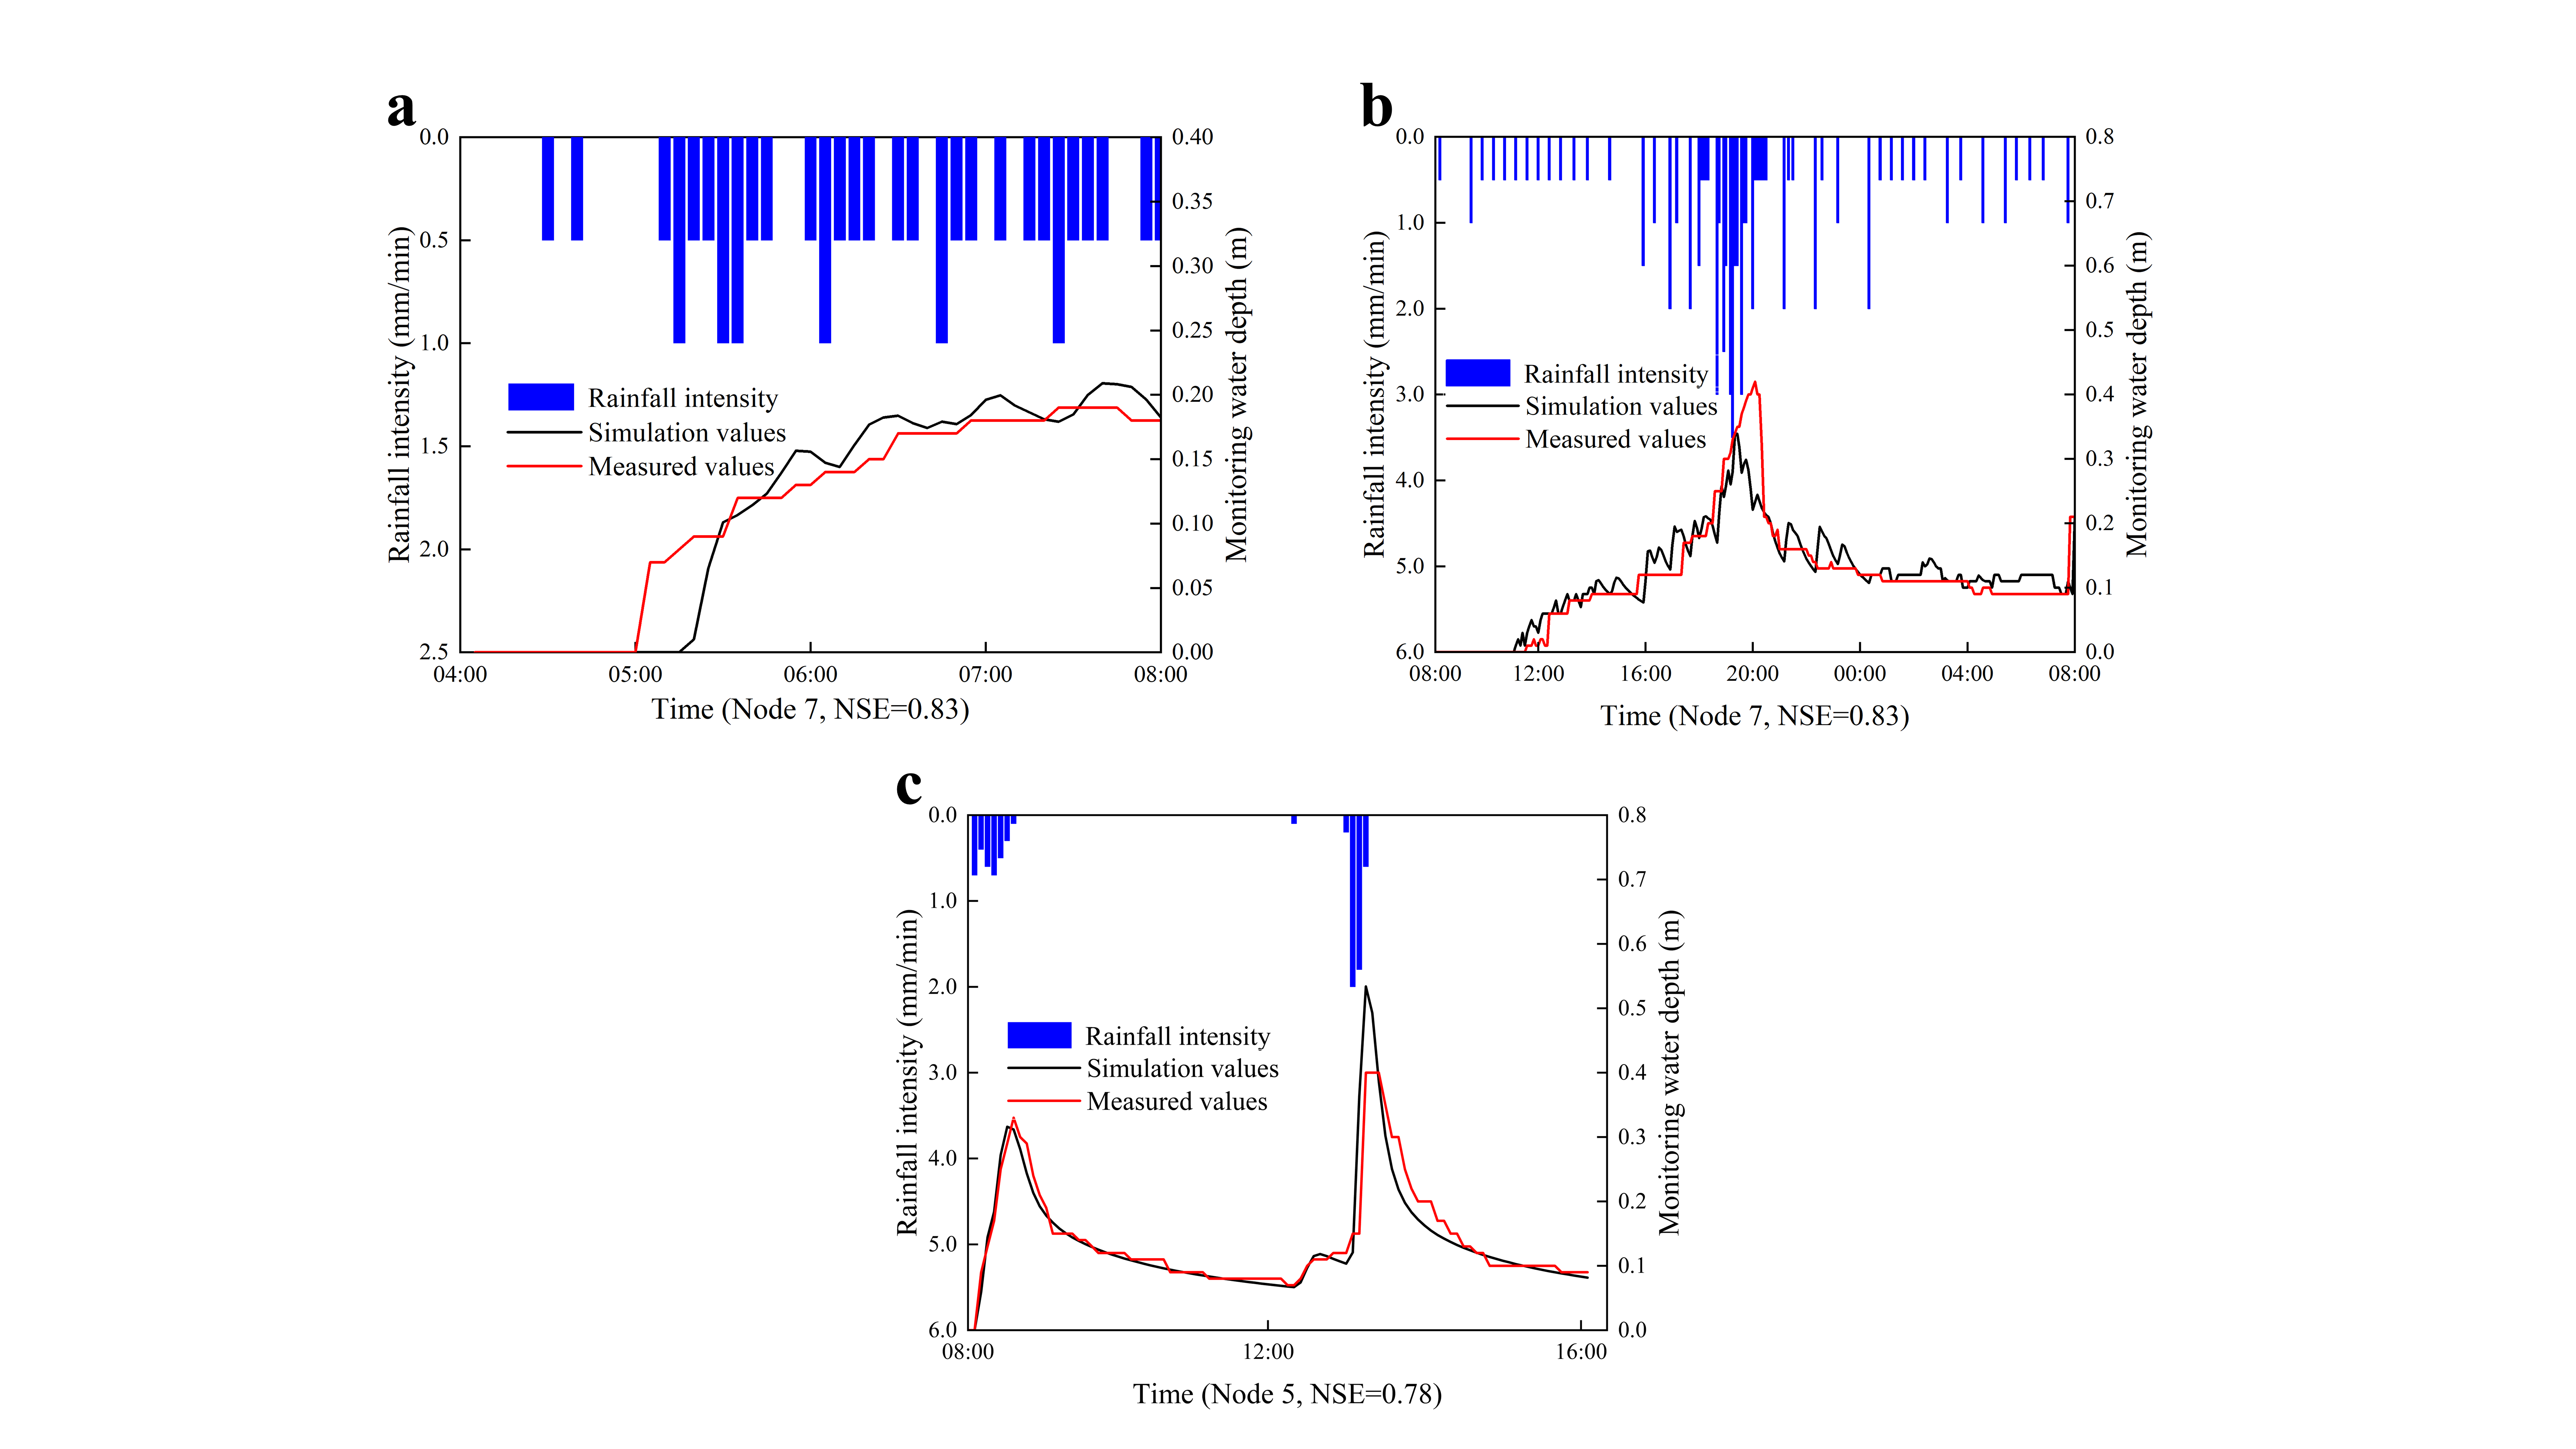


**Fig. S1** Results of model parameter calibration and rainfall runoff process validation results: **a** Rainstorm event on October 22, 2019 **b** Extremely heavy rainstorm event on October 10, 2019 and **c** Rainstorm event on September 12, 2019


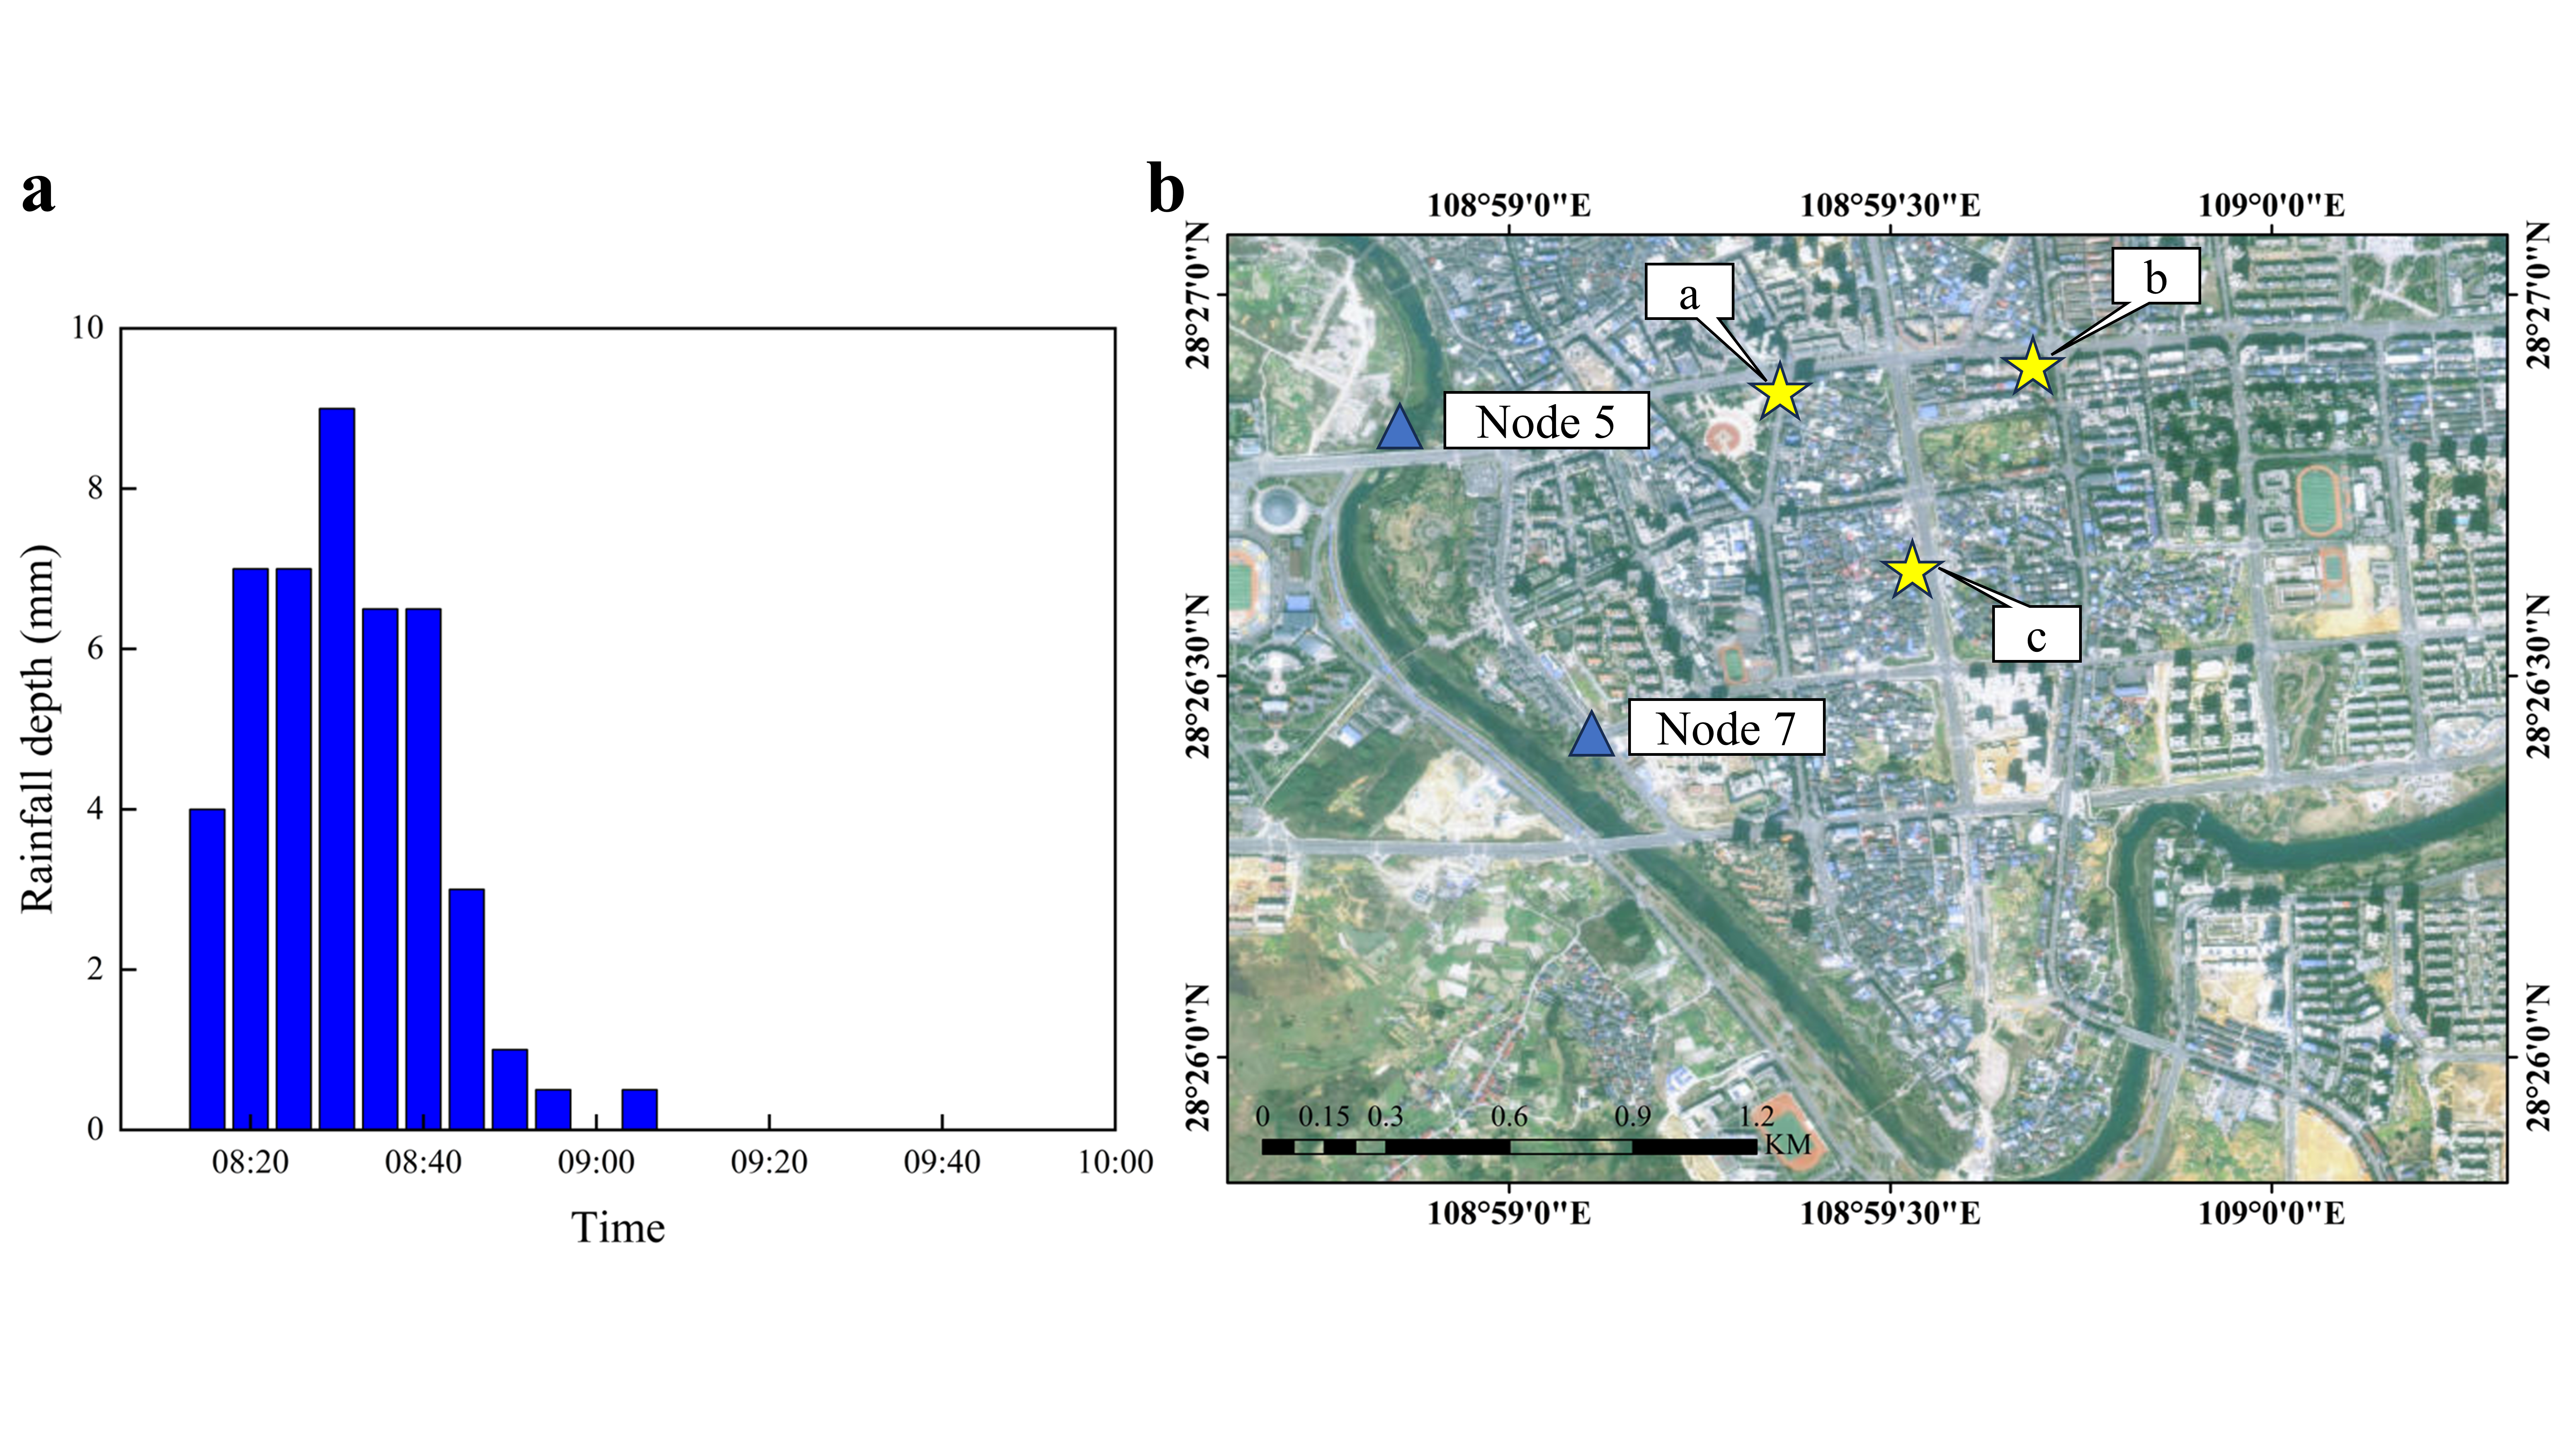


**Fig. S2** Hydrological modeling inputs and validation framework: **a** Precipitation distribution during the August 11, 2020 rainfall event **b** Geographic distribution of calibration and validation points for the 1D-2D coupled hydrodynamic model


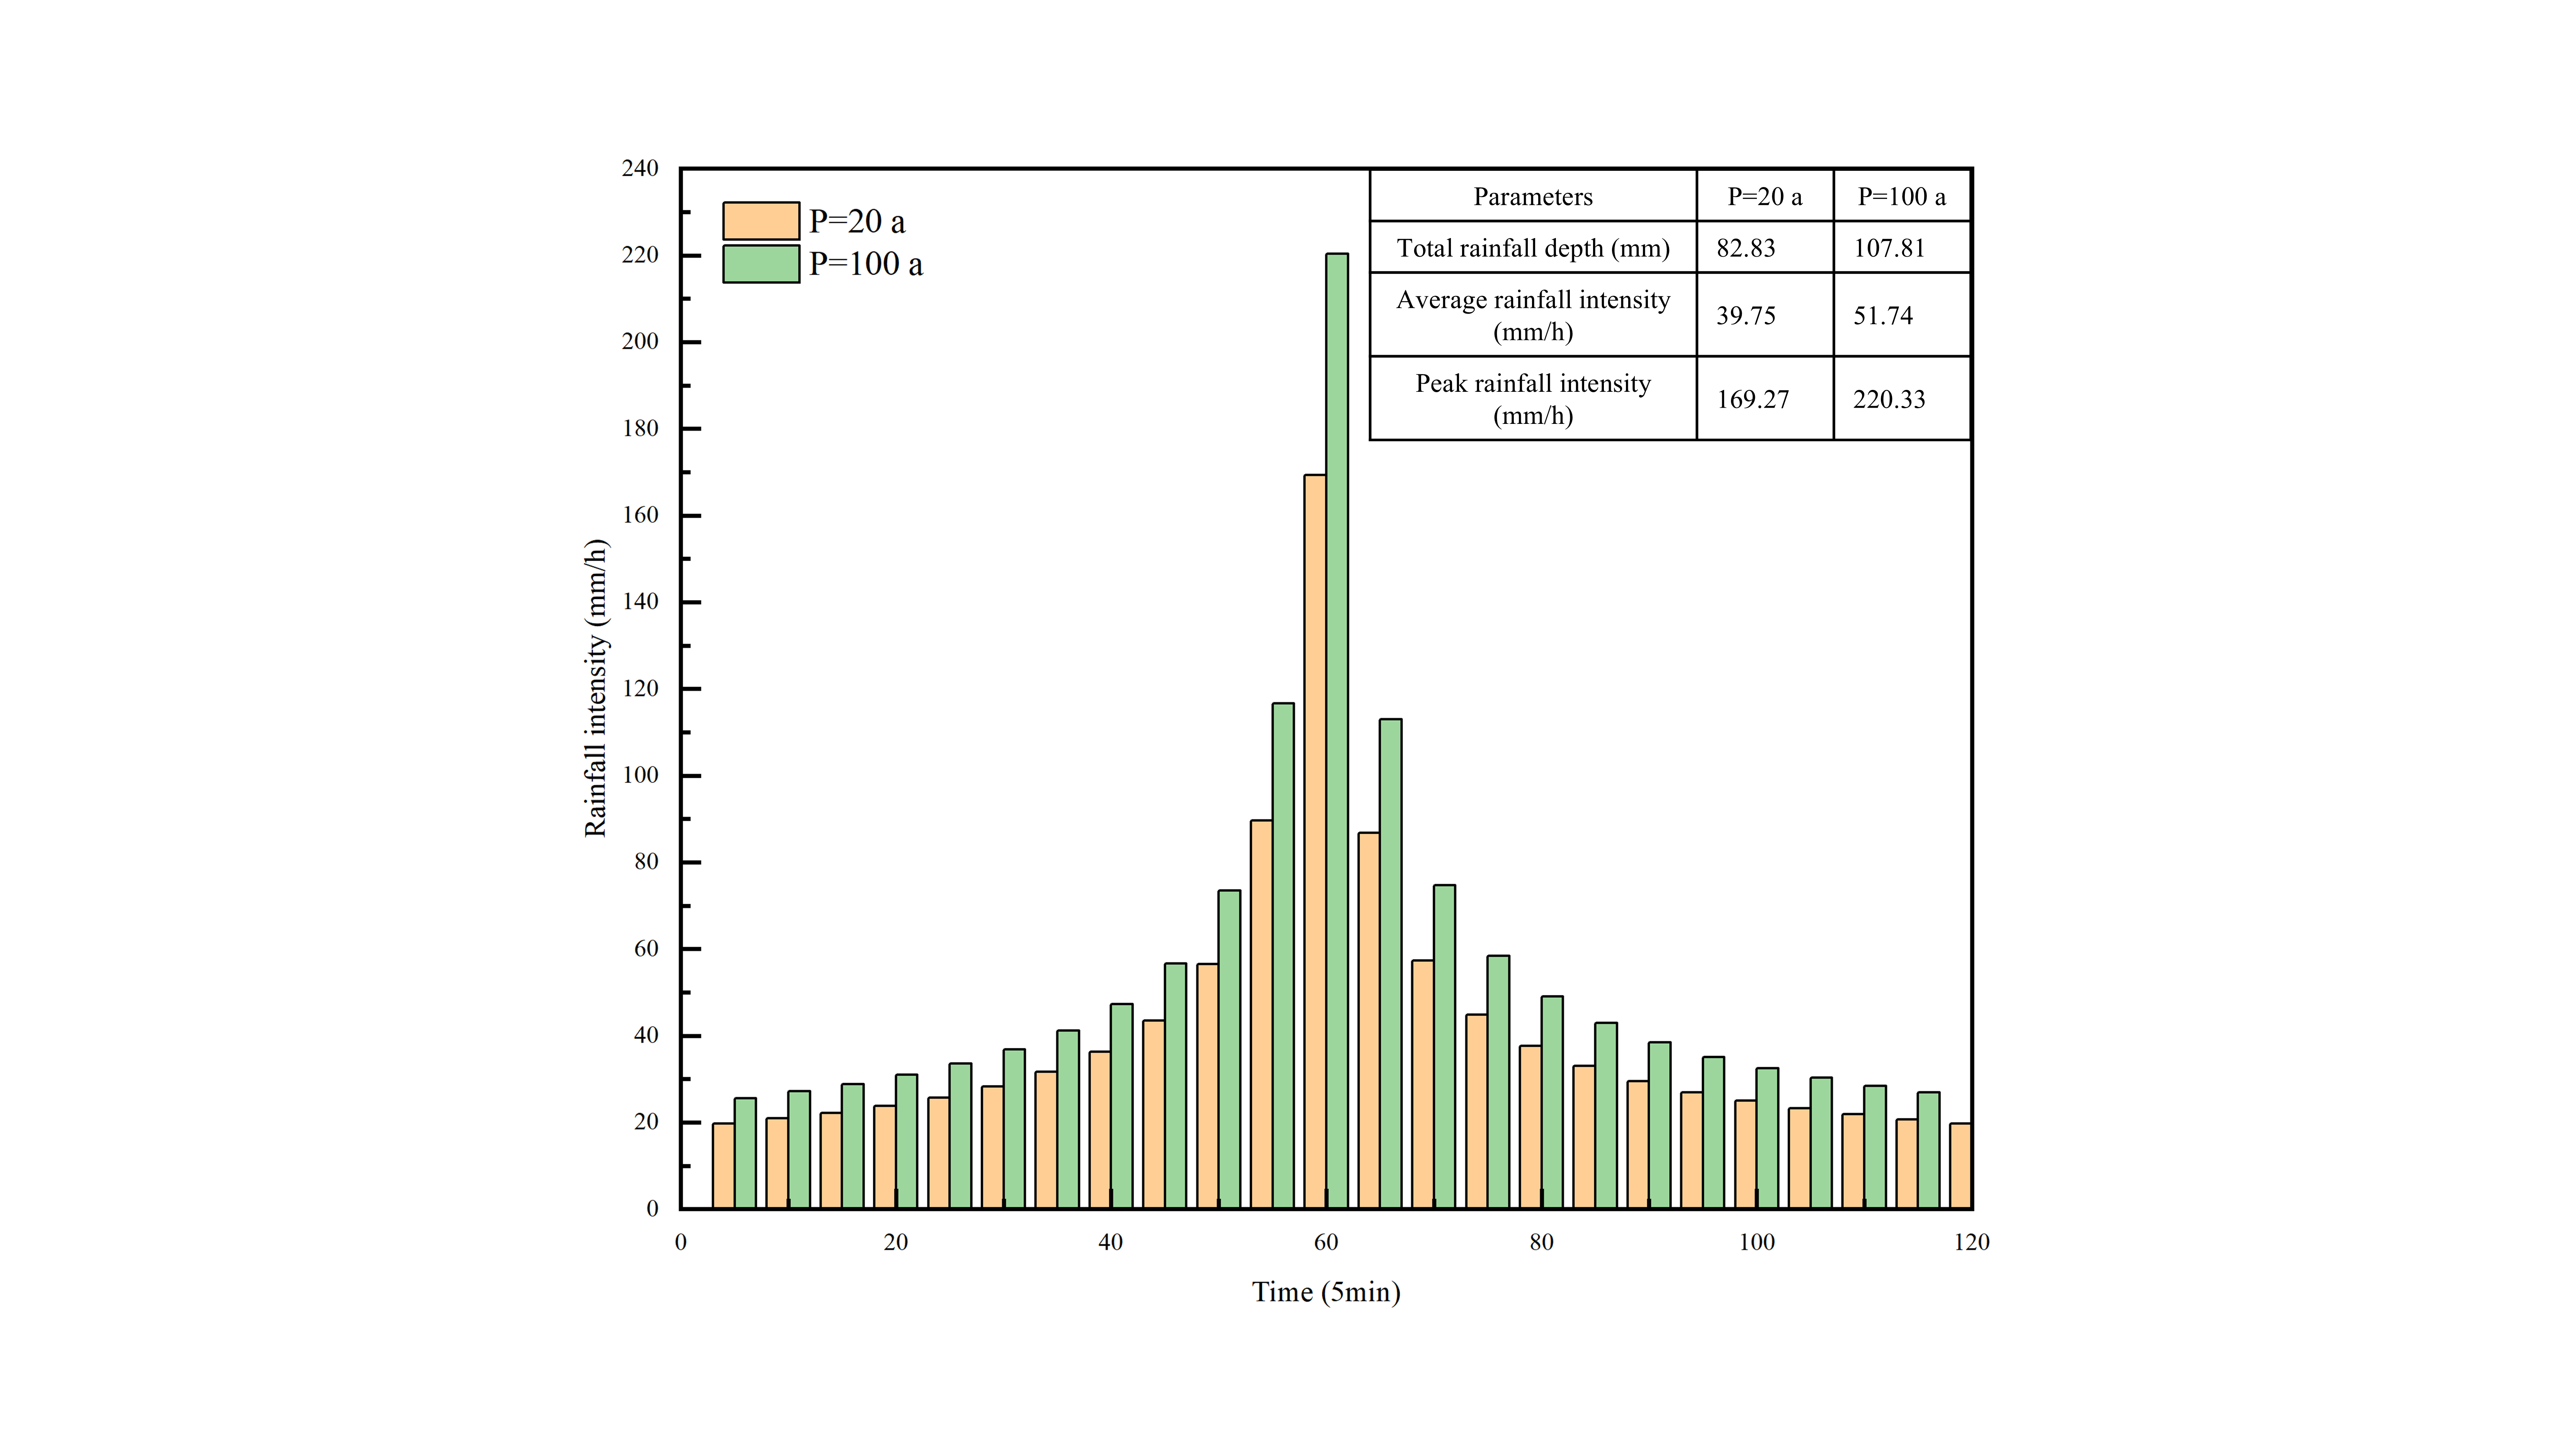


**Fig. S3** Synthetic hyetograph of design rainfalls with two recurrence intervals and corresponding rainfall data
